# Supplementary material
Source: publisher site journal article supplement (https://www.dovepress.com/article/441382)
Supplement: Supplementary file 1 [file get_supplementary_file.php]

## Supplemental Appendix

**Table e1. Multiple Linear Regressions of GAS-D scores and Changes From Baseline at Weeks 12 and 24 on Baseline Characteristics**

| Baseline Characteristics                                       | GAS-D score, $\beta$ | 95% CI        | Changes from baseline in GAS-D score, $\beta$ | 95% CI        |
|----------------------------------------------------------------|----------------------|---------------|-----------------------------------------------|---------------|
| <b>Week 12 (n=106)</b>                                         |                      |               |                                               |               |
| Age (per year)                                                 | -0.08                | -0.38, 0.21   | -0.08                                         | -0.38, 0.22   |
| Female vs male (Ref)                                           | -2.54                | -8.55, 3.46   | -2.63                                         | -8.66, 3.41   |
| History of MDD                                                 |                      |               |                                               |               |
| Duration of current episode (per month)                        | 0.06                 | -0.06, 0.18   | 0.06                                          | -0.06, 0.19   |
| Years since first MDD (per year)                               | 0.03                 | -0.56, 0.63   | 0.04                                          | -0.56, 0.63   |
| Number of MDE (per episode)                                    | 0.60                 | -1.96, 3.15   | 0.59                                          | -1.98, 3.15   |
| Any suicidal attempts; yes vs no (Ref)                         | 5.85                 | -6.68, 18.38  | 6.15                                          | -6.43, 18.73  |
| Antidepressant prescribed before vortioxetine; yes vs no (Ref) | -5.42                | -11.40, 0.57  | -5.39                                         | -11.40, 0.63  |
| MADRS total score (per SD)                                     | 1.00                 | -2.15, 4.14   | 1.04                                          | -2.11, 4.20   |
| <b>Week 24 (n=99)</b>                                          |                      |               |                                               |               |
| Age (per year)                                                 | -0.30                | -0.67, 0.06   | -0.30                                         | -0.66, 0.07   |
| Female vs male (Ref)                                           | -2.17                | -9.40, 5.06   | -2.21                                         | -9.46, 5.04   |
| History of MDD                                                 |                      |               |                                               |               |
| Duration of current episode (per month)                        | 0.03                 | -0.12, 0.19   | 0.03                                          | -0.12, 0.19   |
| Years since first MDD (per year)                               | -0.19                | -0.88, 0.51   | -0.19                                         | -0.88, 0.51   |
| Number of MDE (per episode)                                    | 1.34                 | -1.68, 4.35   | 1.35                                          | -1.68, 4.37   |
| Any suicidal attempts; yes vs no (Ref)                         | 0.61                 | -13.85, 15.06 | 0.89                                          | -13.61, 15.40 |
| Antidepressant prescribed before vortioxetine; yes vs no (Ref) | -5.85                | -13.18, 1.48  | -5.88                                         | -13.23, 1.48  |
| MADRS total score (per SD)                                     | -1.23                | -5.03, 2.58   | -1.19                                         | -5.00, 2.63   |

$\beta$ , coefficient; GAS-D, Goal Attainment Scale adapted for depression; MADRS, Montgomery-Åsberg Depression Rating Scale; MDD, major depressive disorder; MDE, major depressive episode; n, total number of patients. MADRS total score is standardized with a mean of 0 and a SD of 1.
